# Supplementary material for: A minimal model for microbial biodiversity can reproduce experimentally observed ecological patterns
Source: PubMed Central journal article supplement (PMC7039880; doi:10.1038/s41598-020-60130-2), 2020-02-24
Supplement: 41598_2020_60130_MOESM1_ESM.pdf [file 41598_2020_60130_MOESM1_ESM.pdf]

## **Supplementary Information**

**A minimal model for microbial biodiversity can  
reproduce experimentally observed ecological patterns**

**Robert Marsland III, Wenping Cui, Pankaj Mehta**

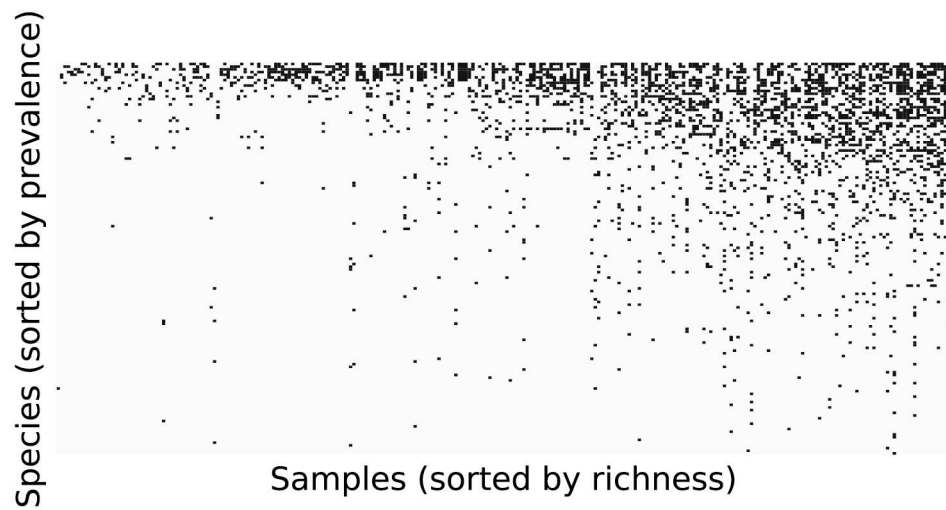

**Supplementary Figure S1.** Presence (black) and absence (white) of each species in simulations where both the environmental harshness  $m_{env}$  and the initial number of species varied from sample to sample (with sampling of both quantities following the same protocols as in Figure 2 of the main text).

MiCRM simulations with metabolically distinct environments

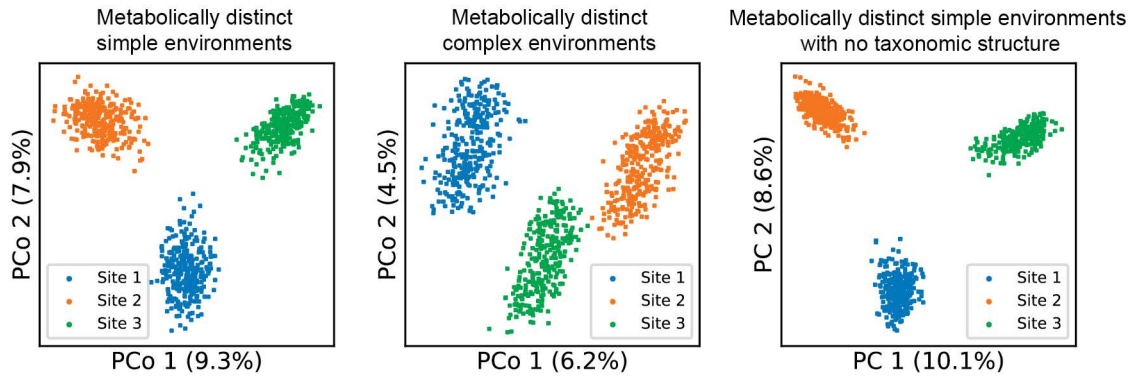

**Supplementary Figure S2.** PCoA of species-level compositions for the three simulated scenarios in which different body sites were supplied with resources from different classes. See Methods for details.

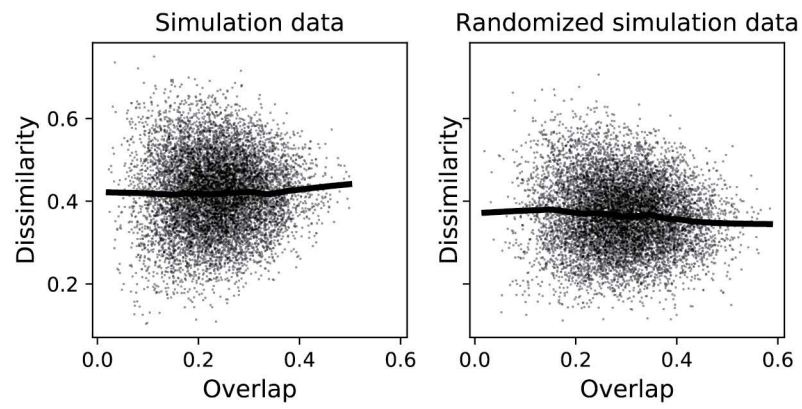

**Supplementary Figure S3.** Dissimilarity vs. overlap for pairs of samples taken from distinct body sites in the simulated HMP data.
